# Supplementary material for: Identification strategy for unknown pollutants using high-resolution mass spectrometry: Androgen-disrupting compounds identified through effect-directed analysis
Source: PubMed Central journal article supplement — Anal Bioanal Chem. 2011 Apr 21;400(9):3141–9. doi: 10.1007/s00216-011-4939-x (PMC3102845; doi:10.1007/s00216-011-4939-x), 2011-04-21
Supplement: 216_2011_4939_MOESM1_ESM.pdf [file 216_2011_4939_MOESM1_ESM.pdf]

**Analytical and Bioanalytical Chemistry**

**Electronic Supplementary Material**

**Identification strategy for unknown pollutants using high-resolution mass spectrometry:**

**Androgen-disrupting compounds identified through effect-directed analysis**

Jana M. Weiss, Eszter Simon, Gerard Stroomberg, Ronald de Boer, Jacob de Boer, Sander van der Linden, Pim E.G. Leonards, Marja H. Lamoree

**Table S1.** Information regarding the 59 accurate masses of interest and the corresponding tentatively identified compounds (which fraction the compound was tentatively identified in, theoretical molecular mass (atomic mass units [u], derived from measured mass [M+H] minus one hydrogen), structure name, CAS number, whether or not it was retention time and bioassay confirmed and information found on the internet). Purchased and tested compounds have been attributed a CAS number in bold.

| Fraction | Molecular mass (u) | Structure name                                                                   | CAS number  | Retention time confirmed | Bioassay confirmed | Information found at a quick internet search                                                                                                                                                   |
|----------|--------------------|----------------------------------------------------------------------------------|-------------|--------------------------|--------------------|------------------------------------------------------------------------------------------------------------------------------------------------------------------------------------------------|
| RP2NP6   | 313.1356           | 1,2,4-Triazino[5,6-b]indole, 3-(2-(1-piperidyl)ethylthio)-                       | 212246-31-6 | Not purchased            |                    | No Google hit                                                                                                                                                                                  |
| RP2NP6   | 260.0832           | 2,5-Diphenylbenzoquinone                                                         | 844-51-9    | Not ionizable            |                    | Some Google hits                                                                                                                                                                               |
| RP2NP6   | 363.1288           | 13-(2,2,2-Trifluoroacetyl)-5,6-benzo-1,4,7,10-tetraoxa-13-azacyclopentadec-5-ene | 216099-71-7 | Not purchased            |                    | No Google hit                                                                                                                                                                                  |
| RP2NP6   | 335.0974           | N-Naphthalen-2-yl-2-(2-oxo-2-phenylethylsulfanyl)-acetamide                      | 300808-97-3 | Not purchased            |                    | No Google hit                                                                                                                                                                                  |
| RP2NP6   | 339.1465           | Papaverin                                                                        | 58-74-2     | Wrong retention time     |                    | An opium alkaloid used primarily in the treatment of visceral spasm, vasospasm (especially those involving the heart and the brain), and occasionally in the treatment of erectile dysfunction |
| RP2NP6   | 265.1461           | Desmethyldoxepin                                                                 | 1225-56-5   | Not purchased            |                    | Desmethyldoxepin is the major metabolite of doxepin. Doxepin is a tricyclic antidepressant that is widely prescribed for the treatment of mild depression                                      |
| RP2NP7   | 321.1723           | cis-Norlobelanin                                                                 | 6035-31-0   | Not purchased            |                    | Some Google hits                                                                                                                                                                               |
| RP2NP7   | 234.0134           | 4-(Trifluoromethyl)phthalic acid                                                 | 835-58-5    | Not purchased            |                    | Suppliers and patent hits                                                                                                                                                                      |
| RP2NP7   | 340.0703           | 4-Naphtho[2,3-d][1,2,3]triazol-1-yl-5-nitro-phthalonitrile                       | no          | Not purchased            |                    | No Google hit                                                                                                                                                                                  |
| RP2NP7   | 231.2193           | 1,1-bis(2,2-dimethylpropoxy)-N,N-dimethyl-Methanamine                            | 4909-78-8   | Not purchased            |                    | No Google hit                                                                                                                                                                                  |
| RP2NP7   | 162.0675           | p-Methoxycinnamaldehyde                                                          | 1963-36-6   | Wrong retention time     |                    | Exists in the Pesticide database and is a flavoring agent                                                                                                                                      |
|          |                    | Methyl cinnamate                                                                 | 103-26-4    | Wrong retention time     |                    | Flavoring and fragrance agent (strawberry and cinnamon)                                                                                                                                        |
|          |                    | Cinnamyl formate/Cinnamyl methanoate                                             | 104-65-4    | Not ionizable            |                    | Flavoring agent                                                                                                                                                                                |

|        |          |                                                          |             |                        |                    |                                                                                                                                                                                                                                                                                                                                                                                                                                                                                    |
|--------|----------|----------------------------------------------------------|-------------|------------------------|--------------------|------------------------------------------------------------------------------------------------------------------------------------------------------------------------------------------------------------------------------------------------------------------------------------------------------------------------------------------------------------------------------------------------------------------------------------------------------------------------------------|
|        |          | Izosafrol                                                | 120-58-1    | Wrong retention time   |                    | Isosafrole is an aromatic organic chemical with a smell similar to anise or licorice. It is found in small amounts in various essential oils, but is most commonly obtained by isomerizing the plant oil safrole.                                                                                                                                                                                                                                                                  |
|        |          | Safrene/Safrol/Shikimole/Rhyuno oil                      | 94-59-7     | Not ionizable          |                    | Safrole is a colorless or slightly yellow oily liquid. It is typically extracted from the root-bark or the fruit of sassafras plants in the form of sassafras oil, or synthesized from other related methylenedioxy compounds. It is the principal component of brown camphor oil, and is found in small amounts in a wide variety of plants, where it functions as a natural pesticide. Safrole is often used as the precursor for the clandestine manufacture of MDMA (ecstasy). |
|        |          | trans-Methyl Cinnamate                                   | 1754-62-7   | Not purchased          |                    | Flavoring agent (bourbon vanilla)                                                                                                                                                                                                                                                                                                                                                                                                                                                  |
| RP2NP7 | 250.0445 | Di(1,2,5-oxadiazolo)[3,4-b;3,4-E]pyrazine, 4,8-diacetyl- | 186205-18-5 | Not purchased          |                    | Only supplier at Google                                                                                                                                                                                                                                                                                                                                                                                                                                                            |
| RP2NP7 | 248.1407 | Parthenolide                                             | 20554-84-1  | Wrong retention time   |                    | Sesquiterpene lactones common in natural medicines                                                                                                                                                                                                                                                                                                                                                                                                                                 |
|        |          | Confertin                                                | 19908-69-1  | Not purchased          |                    | Sesquiterpene lactones common in natural medicines                                                                                                                                                                                                                                                                                                                                                                                                                                 |
|        |          | Tomentosin/Parthenium                                    | 33649-15-9  | Not purchased          |                    | Sesquiterpene lactones common in natural medicines                                                                                                                                                                                                                                                                                                                                                                                                                                 |
| RP2NP7 | 217.0886 | Benzo(a,b or c)carbazole                                 | 239-01-0    | Not purchased          |                    | Benzo(b)carbazole exists in coal tar                                                                                                                                                                                                                                                                                                                                                                                                                                               |
| RP2NP7 | 360.2659 | 6à-Pentyl-4-oxa-5á-androstane-3,17-dione                 | 59251-71-7  | Not purchased          |                    | No Google hit                                                                                                                                                                                                                                                                                                                                                                                                                                                                      |
| RP2NP7 | 232.1458 | Isovelleral                                              | 37841-91-1  | Not purchased          |                    | Some kind of a natural product<br>Sesquidecade                                                                                                                                                                                                                                                                                                                                                                                                                                     |
|        |          | Isoalantolactone                                         | 470-17-7    | Not purchased          |                    | Some kind of a natural product<br>Sesquidecade                                                                                                                                                                                                                                                                                                                                                                                                                                     |
| RP2NP7 | 274.1927 | Nandrolone                                               | 434-22-0    | Correct retention time | Confirmed androgen | Anabolic steroid                                                                                                                                                                                                                                                                                                                                                                                                                                                                   |
| RP2NP7 | 220.1458 | Ibuprofen methyl derivative                              | 61566-34-5  | Not purchased          |                    | Degradation product of ibuprofen                                                                                                                                                                                                                                                                                                                                                                                                                                                   |
| RP2NP7 | 203.0729 | 4-Azapyrene                                              | 194-03-6    | Not purchased          |                    | Polyaromatic hydrocarbon                                                                                                                                                                                                                                                                                                                                                                                                                                                           |
| RP2NP7 | 272.1771 | 19-Norandrostenedione                                    | 734-32-7    | Not purchased          |                    | Anabolic steroids banned in 2007                                                                                                                                                                                                                                                                                                                                                                                                                                                   |
| RP2NP7 | 228.0603 | Benzeneethanethioic acid, S-phenyl ester                 | 18245-74-4  | Not purchased          |                    | Some Google hits                                                                                                                                                                                                                                                                                                                                                                                                                                                                   |

|        |          |                                                           |             |                        |                         |                                                                                                                                                                |
|--------|----------|-----------------------------------------------------------|-------------|------------------------|-------------------------|----------------------------------------------------------------------------------------------------------------------------------------------------------------|
| RP2NP7 | 256.0916 | 3-Phenylthiopropionic acid, S-benzyl ester                | 133535-77-0 | Not purchased          |                         | No Google hit                                                                                                                                                  |
| RP2NP7 | 326.0002 | Tris(2-chloroisopropyl)phosphate                          | 13674-84-5  | Correct retention time | Confirmed anti-androgen | Organophosphorus flame retardant and pesticide                                                                                                                 |
| RP3NP2 | 289.2068 | 4-(t-butyl(dimethylsilyloxy)-3-nitro-2-methylheptane      | 344351-74-2 | Not purchased          |                         | No Google hit                                                                                                                                                  |
| RP3NP2 | 289.1672 | 1-[5-(1,3-benzodioxol-5-yl)-1-oxopentyl]-piperidine       | 23434-88-0  | Not purchased          |                         | US Patent 6849645 - Method of increased bioavailability of nutrients and pharmaceutical preparations with tetrahydropiperine and its analogues and derivatives |
| RP3NP5 | 308.1166 | (5-Bromo-1,2-dimethyl-pentylloxy)-t-butyl-dimethyl-silane | no          | Not purchased          |                         | Only supplier at Google                                                                                                                                        |
| RP3NP5 | 272.1559 | Benzene, 1,1',1''-(1-propanyl-3-ylidene)tris-             | 19120-39-9  | Not purchased          |                         | Some Google hits                                                                                                                                               |
| RP3NP5 | 244.1822 | Celestolide                                               | 13171-00-1  | Wrong retention time   |                         | Musk, fragrance                                                                                                                                                |
|        |          | Phantolid                                                 | 15323-35-0  | Wrong retention time   |                         | Musk, fragrance                                                                                                                                                |
| RP3NP5 | 270.1978 | Androstadienone                                           | 1912-63-6   | Not purchased          |                         | Sexual pheromones (male sweat). Identified in sewage treatment works effluent to be one of the responsible androgens in the EDA (Thomas et al., 2002)          |
|        |          |                                                           | 32222-21-2  | Not purchased          |                         |                                                                                                                                                                |
|        |          |                                                           | 4075-07-4   | Not purchased          |                         |                                                                                                                                                                |
| RP3NP5 | 256.1822 | Deoxyestradiol                                            | 2529-64-8   | Not purchased          |                         | Steroids                                                                                                                                                       |
|        |          |                                                           | 53-63-4     | Not purchased          |                         |                                                                                                                                                                |
| RP3NP5 | 289.2400 | Androstanones oxime                                       | 54156-19-3  | Not purchased          |                         | Sexual pheromones                                                                                                                                              |
|        |          |                                                           | 17556-10-4  | Not purchased          |                         |                                                                                                                                                                |
|        |          |                                                           | 54156-20-6  | Not purchased          |                         |                                                                                                                                                                |
|        |          |                                                           | 14614-11-0  | Not purchased          |                         |                                                                                                                                                                |
|        |          |                                                           | 14546-37-3  | Not purchased          |                         |                                                                                                                                                                |
|        |          |                                                           | 14475-43-5  | Not purchased          |                         |                                                                                                                                                                |

|        |          |                                                                                                    |             |                        |                                                  |                                         |
|--------|----------|----------------------------------------------------------------------------------------------------|-------------|------------------------|--------------------------------------------------|-----------------------------------------|
|        |          |                                                                                                    | 54156-21-7  | Not purchased          |                                                  |                                         |
|        |          |                                                                                                    | 54156-18-2  | Not purchased          |                                                  |                                         |
|        |          |                                                                                                    | 1035-62-7   | Not purchased          |                                                  |                                         |
| RP3NP5 | 266.1615 | Monododecyl phosphate                                                                              | 2627-35-2   | Not purchased          |                                                  | Organophosphorus flame retardant        |
|        |          | Tributyl phosphate                                                                                 | 126-73-8    | Correct retention time | No activity                                      | Organophosphorus flame retardant        |
| RP3NP5 | 240.1509 | Benzylidenecamphor                                                                                 | 15087-24-8  | Not purchased          |                                                  | Industrial chemical                     |
| RP3NP5 | 258.1978 | Musk 36A                                                                                           | 88-29-9     | Not purchased          |                                                  | Musk, fragrance                         |
|        |          | Tonalide                                                                                           | 1506-02-1   | Correct retention time | Confirmed anti-androgen                          | Musk, fragrance                         |
|        |          | Galoxolide                                                                                         | 1222-05-5   | Correct retention time | Confirmed anti-androgen                          | Musk, fragrance                         |
|        |          | Traseolide                                                                                         | 68140-48-7  | Correct retention time | Confirmed anti-androgen                          | Musk, fragrance                         |
| RP3NP5 | 280.1798 | Methyl bis(1,2,2-trimethylpropyl) phosphate                                                        | 108202-69-3 | Not purchased          |                                                  | Organophosphorus flame retardant        |
| RP3NP5 | 268.1822 | 2-tert-Butyl-6-(1-methyl-1-phenylethyl)phenol                                                      | 17959-04-5  | Not purchased          |                                                  | Possible other isomers of the structure |
| RP3NP5 | 390.1969 | Perhydrobenzo[e]isoxazolo[2,3-b][1,2]oxazine-3-carboxamide,4-phenyl-8a-[(1,1,1-trimethylsilyl)oxy] | no          | Not purchased          |                                                  | No Google hit                           |
| RP3NP5 | 290.1822 | Diphenyl-(1,2,3-trimethylcyclopent-2-enyl)methanol                                                 | no          | Not purchased          |                                                  | No Google hit                           |
| RP3NP5 | 272.2135 | Androstenone                                                                                       | 4354-37-4   | Not purchased          |                                                  | Sexual pheromones                       |
|        |          |                                                                                                    | 25824-61-7  | Not purchased          |                                                  |                                         |
|        |          |                                                                                                    | 18339-16-7  | Correct retention time | Confirmed strong anti-androgen and weak androgen |                                         |
|        |          |                                                                                                    | 25824-80-0  | Not purchased          |                                                  |                                         |

|        |          |                                                                |             |                        |                         |                                                                                                                |
|--------|----------|----------------------------------------------------------------|-------------|------------------------|-------------------------|----------------------------------------------------------------------------------------------------------------|
|        |          |                                                                | 3248-10-0   | Not purchased          |                         |                                                                                                                |
|        |          |                                                                | 13583-72-7  | Not purchased          |                         |                                                                                                                |
|        |          |                                                                | 54548-20-8  | Not purchased          |                         |                                                                                                                |
|        |          |                                                                | 2872-90-4   | Not purchased          |                         |                                                                                                                |
|        |          |                                                                | 963-75-7    | Not purchased          |                         |                                                                                                                |
| RP3NP5 | 282.1978 | Methylated androstatrienone                                    | 77702-25-1  | Not purchased          |                         | Sexual pheromones                                                                                              |
|        |          | Methylated androstadienone                                     | 111660-89-0 | Not purchased          |                         |                                                                                                                |
| RP3NP5 | 284.2135 | Dehydroabietal                                                 | 13601-88-2  | Not purchased          |                         | Present in bark and marihuana                                                                                  |
| RP3NP5 | 388.2608 | Dehydrodeoxycholic acid                                        | 2958-05-6   | Not purchased          |                         | Bile acid                                                                                                      |
| RP3NP6 | 314.1656 | Fumarylacetone diethoxime mono-TMS                             | no          | Not purchased          |                         | Not likely this derivative compound would be present                                                           |
| RP3NP6 | 270.1396 | Methylated thiopental                                          | 80783-03-5  | Not purchased          |                         | Google search on thiopental gave: "...is a rapid-onset short-acting barbiturate general anaesthetic".          |
| RP3NP6 | 230.0726 | 7H-Benz[de]anthracen-7-one                                     | 82-05-3     | Correct retention time | Confirmed anti-androgen | Benzanthrone is an aromatic hydrocarbon derivate used as a dyestuff intermediate for anthraquinone-based dyes. |
|        |          | 1-Pyrene-carboxaldehyde                                        | 3029-19-4   | Wrong retention time   |                         | Some Google hits                                                                                               |
| RP3NP7 | 389.2924 | 17-Acetoxyandrostane, 5,19-(1-oxa-4-azabutanediyl)-, N-methyl- | no          | Not purchased          |                         | No Google hit                                                                                                  |
| RP3NP7 | 375.1396 | Haloperidol                                                    | 52-86-8     | Wrong retention time   |                         | Antipsychotic                                                                                                  |
| RP3NP7 | 366.2189 | Bis[3,3,4,7-tetramethyl-1,3-2H-benzofuran-1-yl] ether          | 146950-82-5 | Not purchased          |                         | No Google hit                                                                                                  |
|        |          | Drospirenone                                                   | 67392-87-4  | Not purchased          |                         | From PubChem search results only. Not in NIST. Antiandrogenic potent synthetic progestin.                      |
| RP3NP7 | 360.2659 | Drolban                                                        | 521-12-0    | Not purchased          |                         | Anabolic steroid                                                                                               |
| RP3NP7 | 253.0884 | N,N-Diethyl-2,3,4,5,6-pentafluorobenzylamine                   | 54496-01-4  | Not purchased          |                         | No Google hit                                                                                                  |
| RP3NP7 | 250.0980 | Triazene, 1-tert-butyl-1-cyanomethyl-3-(m-chlorophenyl)-       | no          | Not purchased          |                         | Only supplier at Google                                                                                        |

|        |          |                                                        |            |                        |                         |                                                                                                                                                                |
|--------|----------|--------------------------------------------------------|------------|------------------------|-------------------------|----------------------------------------------------------------------------------------------------------------------------------------------------------------|
| RP3NP7 | 242.0760 | 3-Phenylthiopropionic acid, S-phenyl ester             | 53573-33-4 | Not purchased          |                         | Some Google hits                                                                                                                                               |
| RP4NP2 | 290.2029 | 9,10-Dibutylanthracene                                 | 1624-34-6  | Not purchased          |                         | Some Google hits                                                                                                                                               |
| RP4NP7 | 373.3703 | 6-Azacholestane                                        | 16359-52-7 | Not purchased          |                         | Some Google hits                                                                                                                                               |
| RP4NP7 | 434.3519 | Phosphoric acid, tris(2-ethylhexyl) ester              | 78-42-2    | Correct retention time | Confirmed anti-androgen | Organophosphorus flame retardant                                                                                                                               |
| RP4NP7 | 344.3285 | Batilol                                                | 544-62-7   | Wrong retention time   |                         | The drug stimulates erythrocytes and leukocytes. It stops the flow of blood and hemoglobin in radiation effects on the body and helps speed up their recovery. |
| RP4NP7 | 358.2866 | 1.3-Hydroxychole-9(11)-en-12-one                       | 42921-48-2 | Not purchased          |                         | No Google hit                                                                                                                                                  |
| RP4NP7 | 259.2294 | 1,1'-Bis(bicyclo [2.2.1] hept-5-yl) ethyl ethenylamine | no         | Not purchased          |                         | No Google hit                                                                                                                                                  |
| RP4NP7 | 374.2815 | Tetrahydropyran Z-10-dodecenoate                       | no         | Not purchased          |                         | No Google hit                                                                                                                                                  |
|        |          | 3Beta-hydroxy-5-chole-24-oic acid                      | 5255-17-4  | Not purchased          |                         | Bile acids                                                                                                                                                     |
|        |          | 3-Oxocholanic acid                                     | 1553-56-6  | Not purchased          |                         | Bile acids                                                                                                                                                     |
